# Supplementary material for: The association of eicosanoids and eicosanoid-related metabolites with pulmonary hypertension
Source: PubMed Central journal article supplement — Eur Respir J. 2023 Oct 19;62(4):2300561. doi: 10.1183/13993003.00561-2023 (PMC10586234; doi:10.1183/13993003.00561-2023), 2023-10-19

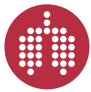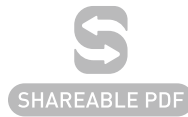

# The association of eicosanoids and eicosanoid-related metabolites with pulmonary hypertension

Jenna N. McNeill<sup>1,8</sup>, Athar Roshandelpoor<sup>2,8</sup>, Mona Alotaibi <sup>3,8</sup>, Arrush Choudhary<sup>4</sup>, Mohit Jain<sup>5</sup>, Susan Cheng<sup>6</sup>, Shahrooz Zarbafian<sup>7</sup>, Emily S. Lau<sup>7</sup>, Gregory D. Lewis <sup>7</sup> and Jennifer E. Ho<sup>2</sup>

<sup>1</sup>Division of Pulmonary and Critical Care, Department of Medicine, Massachusetts General Hospital, Boston, MA, USA. <sup>2</sup>CardioVascular Institute and Division of Cardiology, Department of Medicine, Beth Israel Deaconess Medical Center, Boston, MA, USA. <sup>3</sup>Division of Pulmonary and Critical Care and Sleep Medicine, University of California San Diego, La Jolla, CA, USA. <sup>4</sup>Division of Internal Medicine, Department of Medicine, Beth Israel Deaconess Medical Center, Boston, MA, USA. <sup>5</sup>Department of Medicine and Department of Pharmacology, University of California San Diego, La Jolla, CA, USA. <sup>6</sup>Department of Cardiology, Smidt Heart Institute, Cedars-Sinai Medical Center, Los Angeles, CA, USA. <sup>7</sup>Cardiovascular Research Center and Division of Cardiology, Department of Medicine, Massachusetts General Hospital, Boston, MA, USA. <sup>8</sup>These three authors contributed equally to this work.

Corresponding author: Jennifer E. Ho ([jho@bidmc.harvard.edu](mailto:jho@bidmc.harvard.edu))

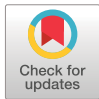

Shareable abstract (@ERSpublications)

Eicosanoids are bioactive lipids that regulate inflammation. This study found that specific eicosanoid metabolites were associated with pulmonary hypertension, including linoleic acid, prostaglandin, arachidonic acid and epoxide derivatives. <https://bit.ly/47Ha6Ni>

**Cite this article as:** McNeill JN, Roshandelpoor A, Alotaibi M, *et al.* The association of eicosanoids and eicosanoid-related metabolites with pulmonary hypertension. *Eur Respir J* 2023; 62: 2300561 [DOI: 10.1183/13993003.00561-2023].

This extracted version can be shared freely online.

Copyright ©The authors 2023.

This version is distributed under the terms of the Creative Commons Attribution Non-Commercial Licence 4.0. For commercial reproduction rights and permissions contact [permissions@ersnet.org](mailto:permissions@ersnet.org)

This article has an editorial commentary:  
<https://doi.org/10.1183/13993003.01547-2023>

Received: 31 March 2023  
Accepted: 16 Aug 2023

## Abstract

**Background** Eicosanoids are bioactive lipids that regulate systemic inflammation and exert vasoactive effects. Specific eicosanoid metabolites have previously been associated with pulmonary hypertension (PH), yet their role remains incompletely understood.

**Methods** We studied 482 participants with chronic dyspnoea who underwent clinically indicated cardiopulmonary exercise testing (CPET) with invasive haemodynamic monitoring. We performed comprehensive profiling of 888 eicosanoids and eicosanoid-related metabolites using directed non-targeted mass spectrometry, and examined associations with PH (mean pulmonary arterial pressure (mPAP) >20 mmHg), PH subtypes and physiological correlates, including transpulmonary metabolite gradients.

**Results** Among 482 participants (mean±SD age 56±16 years, 62% women), 200 had rest PH. We found 48 eicosanoids and eicosanoid-related metabolites that were associated with PH. Specifically, prostaglandin (11β-dhk-PGF2α), linoleic acid (12,13-EpOME) and arachidonic acid derivatives (11,12-DiHETrE) were associated with higher odds of PH (false discovery rate  $q < 0.05$  for all). By contrast, epoxide (8(9)-EpETE), α-linolenic acid (13(S)-HOTrE(γ)) and lipokine derivatives (12,13-DiHOME) were associated with lower odds. Among PH-related eicosanoids, 14 showed differential transpulmonary metabolite gradients, with directionality suggesting that metabolites associated with lower odds of PH also displayed pulmonary artery uptake. In individuals with exercise PH, eicosanoid profiles were intermediate between no PH and rest PH, with six metabolites that differed between rest and exercise PH.

**Conclusions** Our findings highlight the role of specific eicosanoids, including linoleic acid and epoxide derivatives, as potential regulators of inflammation in PH. Of note, physiological correlates, including transpulmonary metabolite gradients, may prioritise future studies focused on eicosanoid-related pathways as important contributors to PH pathogenesis.

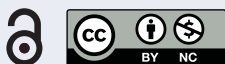

Supplement: ERJ-00561-2023.Shareable.pdf [file ERJ-00561-2023.Shareable.pdf]
